# Supplementary material for: Assessing lead and cadmium tolerance of Chenopodium ambrosioides during micropropagation: an in-depth qualitative and quantitative analysis
Source: PeerJ. 2023 Nov 29;11:e16369. doi: 10.7717/peerj.16369 (PMC10693238; doi:10.7717/peerj.16369)
Supplement: Data S1 [file peerj-11-16369-s001.xlsx]

## Sheet: Data Table 1 to 3
	Table 1
	Node explant
	PGR	Conc	∑ explant cultured	Infected	Brown	%Re.	AC	Characteristic
		(mg/l)					(mg)
		0.5		3	1	55.6b	75	Reddish purple, brownish, compact, granular
	NAA	1	9	3	--	66.7a	138
		1.5		2	1	66.7a	127
		0.5		2	3	44.4b	67	Light Reddish purple, soft, granular
	IAA	1	9	4	--	55.6b	122
		1.5		2	1	66.7a	131
		0.5		3	2	44.4c	˃	Light yellowish compact, granular, light, hard
	BA	1	9	4	1	44.4c	˃
		1.5		4	--	55.6c	˃
	BA/	0.5/0.5		4	--	55.6c	102	Light yellowish, friable, granular
	NAA	1.0/0.5	9	2	1	66.7a	162
		1.5/0.5		3	1	55.6b	157
		0.5/0.5		3	2	44.4b	86
	BA/	1.0/0.5	9	2	--	77.8a	158	Reddish purple, soft, granular
	IAA	1.5/0.5		2	1	66.7a	149
	Control	0.0/0.0		2	7	--	--	--
	Leaf explant
	PGR	Conc	∑ explant cultured	Infected	Brown	%Re.	AC	Characteristics
		(mg/l)					(mg)
		0.5		3	--	66.6b	82	Reddish purple, granular, soft
	NAA	1	9	3	1	55.6c	163
		1.5		1	1	77.8a	151
		0.5		2	2	55.6c	69	Reddish purple, soft, Brownish, granular
	IAA	1	9	1	2	66.7b	138
		1.5		1	2	66.7b	152
		0.5		2	7	--	--
	BA	1	9	3	6	--	--	--
		1.5		3	6	--	--
	BA/	0.5/0.5		1	2	66.7b	113	Creamy, Reddish purple, granular, soft
	NAA	1.0/0.5	9	2	2	55.6c	159
		1.5/0.5		2	3	58.7c	192
		0.5/0.5		2	3	44.4d	95
	BA/	1.0/0.5	9	2	1	66.7b	179	Light Reddish purple, soft, granular
	IAA	1.5/0.5		2	1	66.7b	173
	Control	0.0/0.0	9	2	7	--	--	--
	Petiole explant
	PGR	Conc	∑ explant cultured	Infected	Brown	%Re.	AC	Characteristics
		(mg/l)					(mg)
		0.5		2	2	55.6c	102	Creamy, Brownish, soft, granular
	NAA	1	9	--	2	77.8a	156
		1.5		1	1	77.8a	135
		0.5		2	2	55.6c	97
		1	9	1	2	66.7b	175	Dark brownish, soft, granular
	IAA	1.5		2	1	66.7b	179
	BA	0.5		2	7	--	--
		1	9	2	7	--	--	--
		1.5		1	8	--	--
	BA/	0.5/0.5		2	2	55.6c	121	Creamy, brownish, soft and friable
	NAA	1.0/0.5	9	1	2	66.7b	189
		1.5/0.5		1	1	77.8a	198
		0.5/0.5		2	2	55.6c	87
	BA/	1.0/0.5	9	2	1	66.7b	167	Light brownish, soft, granular
	IAA	1.5/0.5		1	1	77.8a	183
	Control	0.0/0.0	9	2	7	--	--	--
	Table 2
	PGR	Conc. (mg/l)	Node derived		Leaf derived		Petiole derived callus
			Callus		Callus
			NS ±Sd	LS (cm)±Sd	NS	LS	NS	LS
	NAA	1	5+6+9+5+6= 6.2±0.61c	2.8+3.7+3.3+3.0+3.3= 3.21±0.39a	NR	NR	NR	NR
		1.5	7+6+8+5+7= 6.4±0.34c	3.9+4.7+4.2+3.7+3.9= 4.04±0.78a	"	"	"	"
		2	7+5+5+4= 5.45±1.73c	2.5+2.2+3.0+2.6= 2.56±0.26a	"	"	"	"
	BA	1.5	12+10+9+10+13= 10.84±1.45a	4.7+5.5+4.8+5.4+5.6= 5.21±0.83b	"	"	"	"
		2	14+17+13+15+15= 14.83±0.95b	5.6+4.8+5.6+5.4+5.7= 5.42±0.08b	"	"	"	"
	BA/	1.5/1.0	11+7+9+8+12= 9.43±0.63a	3.8+4.2+3.6+3.8+3.5= 3.73±0.29a	"	"	"	"
	NAA	2.0/1.0	10+8+7+8+10= 8.78±0.49a	3.5+2.9+3.5+3.6+3.3= 3.34±0.84a	"	"	"	"
	PGR	Concentration (mg/l)	Number of shoots ±Sd	Length of shoots (cm) ±Sd
	BA/NAA	1.0/1.0	21+19+18+17+18= 18.73±1.67a	5.8+4.7+5.3+4.8+5.6= 5.26±0.27a
		1.5/1.0	20+23+22+20+22= 21.89±1.94a	5.2+5.6+6.1+4.8+5.7= 5.49±0.84a
		2.0/1.0	18+18+20+19+17= 18.39±1.68a	4.7+5.2+5.3+4.6+4.3= 4.82±0.76a
	BA	1	19+17+15+16+16= 16.57±1.03b	3.5+4.2+3.3+3.2+3.7= 3.65±0.72b
		1.5	19+16+15+16+16= 16.49±0.82b	3.6+3.8+4.6+4.5+3.7= 4.05±0.32b
		2	16+13+15+14+15= 14.61±0.61b	3.8+4.5+3.5+2.9+3.9= 3.95±0.84b
	Kn/NAA	1.0/1.0	13+10+12+12+10= 11.43±0.72c	3.2+2.6+2.8+3.5+3.5= 3.13±0.39c
		1.5/1.0	9+11+10+8+11= 9.87±0.54c	3.5+3.7+3.2+3.2+3.6= 3.47±0.48c
		2.0/1.0	9+10+9+8+10= 9.35±0.39c	2.5+2.6+2.6+2.5+3.5= 2.78±0.07c
	Kn	1	8+7+7+8+9= 7.83±0.86c	2.4+2.5+2.6+2.7+2.3= 2.58±0.09c
		1.5	7+8+7+7+8= 7.95±0.35c	2.3+2.4+2.7+2.5+2.3= 2.47±0.41c
		2	9+8+8+7+10= 8.46±0.08c	1.8+1.8+2.3+1.7+1.6= 1.85±0.15c
	Control	-	---	---

## Sheet: Data Table 4
	PGR	Conc. (mg/l)	% Rooted shoot				Roots number/ explant ±Sd	Roots length (cm) ±Sd
			∑ explant cultured	Infec.	Brown	%Respo
		1		1	1	77.8a	11+13+14+11+13=12.3±0.58a	10.3+8.8+9.4+9.3+8.6=9.34±0.42b
	NAA	1.5		3	--	66.7b	12+10+12+11+13=11.61±0.47a	13.6+11.8+14.3+11.6+12.6=12.81±0.72a
		2	9	3	--	66.7b	9+11+10+9+10=9.89±0.09b	10.5+9.7+11.6+10.8+11.3=10.79±0.91b
	BA/NAA	1.5/1.0		2	3	44.4c	7+10+8+9+7= 8.07±0.16b	13.5+12.6+14.6+13.3+12.6=13.23±1.03a
	Kn/NAA	1.5/1.0		1	8	--	--	--
	Table 4
	PGR	Conc. (mg/l)	% Rooted shoot				Roots number/ explant ±Sd	Roots length (cm) ±Sd
			∑ explant cultured	Infec.	Brown	%Respo
		1		1	1	77.8a	11+13+14+11+13=12.3±0.58a	10.3+8.8+9.4+9.3+8.6=9.34±0.42b
	NAA	1.5		3	--	66.7b	12+10+12+11+13=11.61±0.47a	13.6+11.8+14.3+11.6+12.6=12.81±0.72a
		2	9	3	--	66.7b	9+11+10+9+10=9.89±0.09b	10.5+9.7+11.6+10.8+11.3=10.79±0.91b
	BA/NAA	1.5/1.0		2	3	44.4c	7+10+8+9+7= 8.07±0.16b	13.5+12.6+14.6+13.3+12.6=13.23±1.03a
	Kn/NAA	1.5/1.0		1	8	--	--	--

## Sheet: Data Table 5
	Table 5
	Metals (mg/l)		Multiplication%
										Dry weight (mg) ±Sd
									Toxicity symptoms
	Lead	Cadm.	∑ explant cultured	Infected	Brown	%response	Number of shoot ±Sd	Length of shoot ±Sd
									In few illustrations green and reddish purple branches with normal leaf and petiole were noted.
	0.5									20±1.8a
							13+16+15+14+15= 14.57±2.03a	5.2+5.8+4.8+4.7+5.3= 5.16±1.29c
			9	2	2	55.6
	1.5		9	1	2	66,7	11+13+12+11+10= 11.69±2.82b	6.8+7.6+7.4+8.5+7.3= 7.52±1.44b	Shoots were reddish purple color with broad leaf lamina and short petiole as in the mother plants.	26±2.3b
	2.5									33±2.9b
			9	2	2	55,6	10+11+12+12+11= 11.31±1.61b	9.4+10.3+10.6+9.7+9.3= 9.86±2.36a
		0.5	9	2	-	77.8	17+17+16+16+15= 16.31±1.61a	5.4+6.7+5.8+7.4+6.5= 6.36±1.47c	Normal	32±2.08b
		1.5		1	2	66.7	14+14+13+15+13= 13.89±1.94b	7.6+8.4+7.6+8.5+8.6= 8.15±1.39b	Reddish purple color shoots with disturbed morphology (narrow leaf lamina and elongated petiole)	37±2.6b
										41±3.35b
		2.5	9	2	2	55.6	13+15+14+14+15= 14.09±1.68b	13.4+12.6+13.9+11.3+11.4=12.51±2.73a
	Control		9	1	8	88.9	20+17+18+19+19= 18.73±1.6a	4.3+5.8+6.7+6.1+5.2= 5.61±1.4c	Normal	17±2.0a
